# Supplementary material for: Complexes of copper(ii) with 3-(ortho-substituted phenylhydrazo)pentane-2,4-diones: syntheses, properties and catalytic activity for cyclohexane oxidation
Source: Royal Society of Chemistry journal article supplement (doi:10.1039/c0dt01527j), 2011-01-01
Supplement: c0dt01527j.pdf [file c0dt01527j.pdf]

# Electronic Supplementary Information

## Complexes of copper(II) with 3-(*ortho*-substituted phenylhydrazo)pentane-2,4-diones: syntheses, properties and catalytic activity for cyclohexane oxidation

Maximilian N. Kopylovich,<sup>a</sup> Andreia C. C. Nunes,<sup>a</sup> Kamran T. Mahmudov,<sup>a</sup> Matti Haukka,<sup>b</sup>  
Tatiana C. O. Mac Leod,<sup>a</sup> Luísa M. D. R. S. Martins,<sup>a,c</sup> Maxim L. Kuznetsov,<sup>a</sup>  
Armando J. L. Pombeiro<sup>\*a</sup>

<sup>a</sup> *Centro de Química Estrutural, Complexo I, Instituto Superior Técnico, TU Lisbon,  
Av. Rovisco Pais, 1049-001 Lisbon, Portugal*

<sup>b</sup> *University of Joensuu, Department of Chemistry, P.O. Box 111, FIN-80101, Joensuu, Finland,*

<sup>c</sup> *Departamento de Engenharia Química, ISEL, R. Conselheiro Emídio Navarro, 1959-007 Lisboa,  
Portugal*

\*Corresponding author.

*E-mail addresses:* [pombeiro@ist.utl.pt](mailto:pombeiro@ist.utl.pt) (Armando J. L. Pombeiro).

## Substituent constants

Table S1 Substituent constants

| Substituents                     | $\sigma_p^a$ | $\sigma_o^b$ | $\sigma_1^a$ |
|----------------------------------|--------------|--------------|--------------|
| -OH                              | -0.37        | -0.24        | 0.25         |
| -AsO <sub>3</sub> H <sub>2</sub> | -0.02        | -0.01        | -            |
| -Cl                              | 0.23         | 0.15         | 0.47         |
| -SO <sub>3</sub> H               | 0.35         | 0.23         | -            |
| -COOCH <sub>3</sub>              | 0.45         | 0.29         | 0.30         |
| -COOH                            | 0.45         | 0.29         | 0.30         |
| -NO <sub>2</sub>                 | 0.78         | 0.51         | 0.63         |
| -H                               | 0            | 0            | 0            |

<sup>a</sup> C. Hansch, A. Leo, W. R. Taft, *Chem. Rev.* 1991, **91**, 165; C. Laurence, B. Wojtkowiak, *Ann. Chim.* 1970, **5**, 163; B. P. McDaniel, H. C. Brown, *J. Am. Chem. Soc.* 1958, **23**, 420; V. A. Pal'm, *Rus. Chem. Rev.* 1961, **30**, 471;

<sup>b</sup> Values were calculated by equation  $\sigma_o = 0.65 \cdot \sigma_p$ . (A. Beteringhe, *Central Eur. J. Chem.* 2005, **3**, 585).

## Computational details

**Table S2** Total energies, enthalpies, Gibbs free energies (in Hartree) and entropies (in cal·mol<sup>-1</sup>K<sup>-1</sup>) of the calculated structures for gas-phase and water solution

|                                                                             | E <sub>g</sub> | E <sub>s</sub> | H <sub>g</sub> | H <sub>s</sub> | S <sub>g</sub> | S <sub>s</sub> | G <sub>g</sub> | G <sub>s</sub> |
|-----------------------------------------------------------------------------|----------------|----------------|----------------|----------------|----------------|----------------|----------------|----------------|
| H <sub>2</sub> O                                                            | -76.422572     | -76.434146     | -76.397694     | -76.409268     | 46.50          | 25.37          | -76.419789     | -76.421322     |
| <i>trans</i> -<br>Cu(H <sub>2</sub> O) <sub>2</sub> (OH) <sub>2</sub>       | -501.889708    | -501.913699    | -501.802952    | -501.826943    | 94.01          | 51.02          | -501.847621    | -501.851184    |
| <i>cis</i> -Cu(H <sub>2</sub> O) <sub>2</sub> (OH) <sub>2</sub>             | -501.885273    | -501.912323    | -501.798819    | -501.825869    | 95.83          | 52.01          | -501.844350    | -501.850581    |
| L <sub>1</sub>                                                              | -761.571563    | -761.588873    | -761.336899    | -761.354209    | 125.99         | 68.29          | -761.396760    | -761.386656    |
| L <sub>2</sub>                                                              | -3146.434639   |                | -3146.177179   |                | 150.57         |                | -3146.248719   |                |
| L <sub>3</sub>                                                              | -1145.943481   |                | -1145.722540   |                | 128.38         |                | -1145.783535   |                |
| L <sub>4</sub>                                                              | -1310.147887   | -1310.161000   | -1309.899940   | -1309.913053   | 143.68         | 77.85          | -1309.968207   | -1309.950042   |
| L <sub>5</sub>                                                              | -914.235881    |                | -913.958974    |                | 144.46         |                | -914.027612    |                |
| L <sub>6</sub>                                                              | -874.930175    |                | -874.683164    |                | 136.81         |                | -874.748167    |                |
| L <sub>7</sub>                                                              | -890.854244    |                | -890.620086    |                | 136.99         |                | -890.685174    |                |
| L <sub>8</sub>                                                              | -686.351342    | -686.361137    | -686.121915    | -686.131710    | 121.11         | 65.66          | -686.179456    | -686.162907    |
| [Cu(OH)(L <sub>8</sub> )<br>(H <sub>2</sub> O)](H <sub>2</sub> O)           | -1111.835151   | -1111.852626   | -1111.544688   | -1111.562163   | 166.92         | 90.39          | -1111.623995   | -1111.605110   |
| [Cu(L <sub>1</sub> )(H <sub>2</sub> O) <sub>2</sub> ]<br>(H <sub>2</sub> O) | -1187.091071   | -1187.108453   | -1186.795078   | -1186.812460   | 164.32         | 88.99          | -1186.873153   | -1186.854742   |
| [Cu(L <sub>4</sub> )(H <sub>2</sub> O) <sub>2</sub> ]<br>(H <sub>2</sub> O) | -1735.678476   | -1735.703365   | -1735.368377   | -1735.393266   | 180.58         | 97.77          | -1735.454178   | -1735.439720   |

## Thermal behaviours of 1–8 and some of their copper(II) complexes

The thermal properties of the ADB and their copper(II) complexes were investigated by thermogravimetric analysis (TG), derivative thermogravimetry (DTG) and differential thermal analysis (DTA). The thermodynamic parameters of decomposition of the complexes, namely the activation energy ( $E_a$ ), enthalpy ( $\Delta^\ddagger H$ ), entropy ( $\Delta^\ddagger S$ ) and free energy ( $\Delta^\ddagger G$ ), as well as the pre-exponential factor ( $A$ ) were evaluated graphically using the Coats-Redfern relationship [(a) A. W. Coats, J. P. Redfern, *Nature*, 1964, **20**, 68; (b) E. Urbanovici, C. Popescu, E. Segal, *J. Ther. Anal. Calor.*, 1999, **58**, 683]:

$$\ln\{[-\ln(1-\alpha)]/T^2\} = -E_a/RT + \ln[AR/\phi E_a],$$

where  $\alpha$  is the fraction of the sample decomposed at temperature  $T$ ,  $A$  is the pre-exponential factor,  $\phi$  the heating rate,  $E_a$  the activation energy and  $R$  the gas constant. A plot of  $\ln\{[-\ln(1-\alpha)]/T^2\}$  against  $1/T$  gives a slope from which  $E_a$  was calculated, and  $A$  was determined from the intercept. The activation entropy ( $\Delta^\ddagger S$ ), enthalpy ( $\Delta^\ddagger H$ ) and free energy change ( $\Delta^\ddagger G$ ) were calculated using the following equations:

$$\Delta^\ddagger S = 2.303R \lg(Ah/kT_s),$$

$$\Delta^\ddagger H = E_a - RT_s,$$

$$\Delta^\ddagger G = \Delta^\ddagger H - T_s \Delta^\ddagger S,$$

where  $k$ ,  $h$  and  $T_s$  are the Boltzman constant, the Planck constant and the DTG peak temperature, respectively.

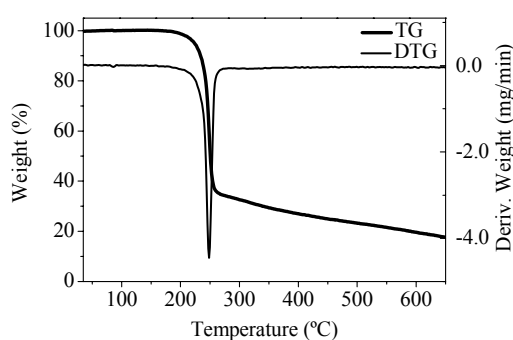

1

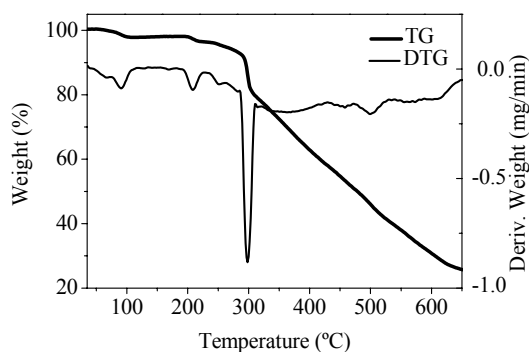

2

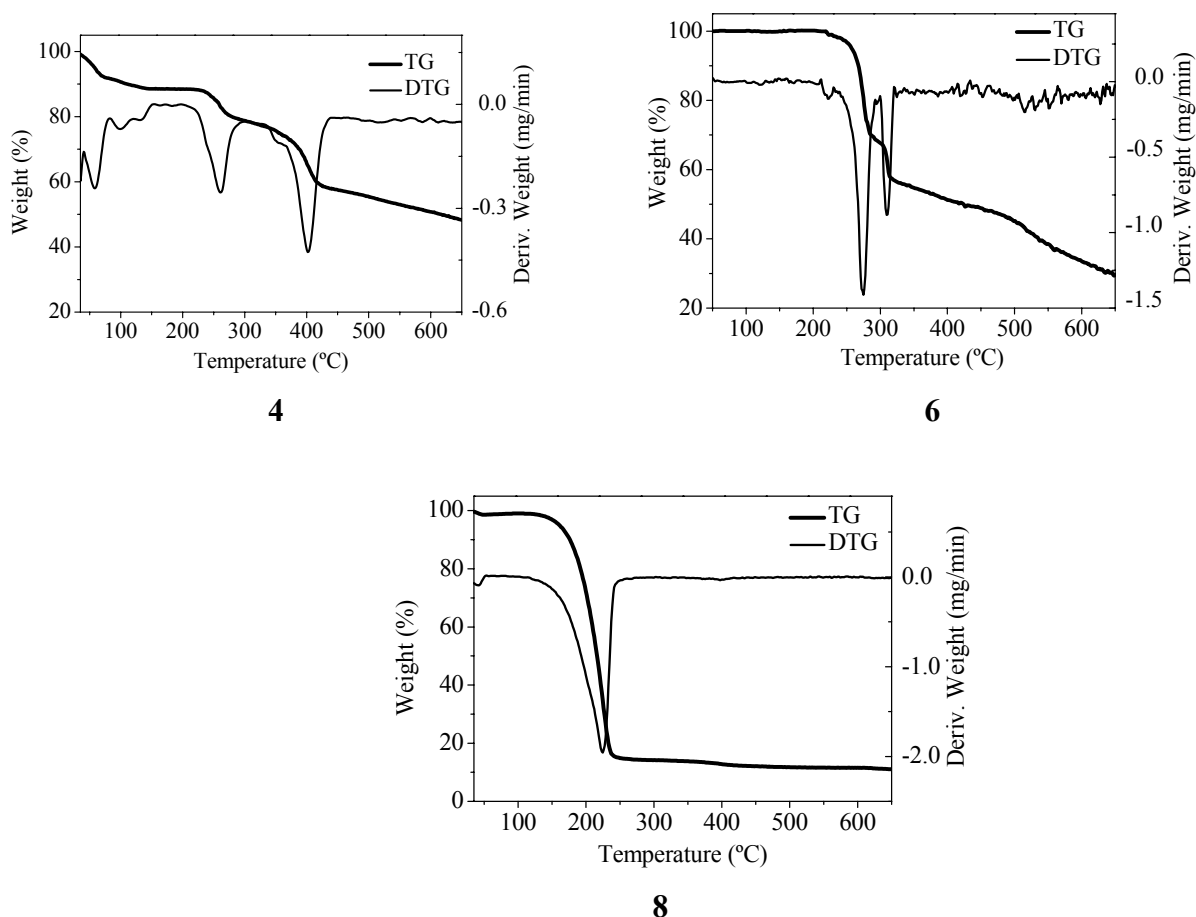

Fig. S1 TG and DTG curves of 1, 2, 4, 6 and 8.

Table S3 Thermal behaviours and kinetic parameters of 1, 2, 4, 6 and 8

| Compound | Temperature range (K) | % Weight loss found | DTG peak temperature (K) | $A$ ( $s^{-1}$ )    | $E_a$ ( $kJ \cdot mol^{-1}$ ) | $\Delta^\ddagger H$ ( $kJ \cdot mol^{-1}$ ) | $\Delta^\ddagger S$ ( $J \cdot K^{-1} mol^{-1}$ ) | $\Delta^\ddagger G$ ( $kJ \cdot mol^{-1}$ ) |
|----------|-----------------------|---------------------|--------------------------|---------------------|-------------------------------|---------------------------------------------|---------------------------------------------------|---------------------------------------------|
| 1        | 470–568               | 66.0                | 527                      | $3.3 \cdot 10^8$    | 112                           | 107                                         | –87                                               | 153                                         |
| 2        | 343–388               | 1.98                | 368                      | $9.2 \cdot 10^{-2}$ | 22.5                          | 19.4                                        | –267                                              | 118                                         |
|          | 466–504               | 1.78                | 484                      | 0.21                | 31.5                          | 27.5                                        | –262                                              | 154                                         |
|          | 520–593               | 17.8                | 575                      | 62.6                | 55.8                          | 51.0                                        | –216                                              | 175                                         |
| 4        | 338–377               | 3.1                 | 356                      | $5.8 \cdot 10^{-4}$ | 5.5                           | 2.6                                         | –308                                              | 112                                         |
|          | 486–561               | 9.0                 | 536                      | $1.1 \cdot 10^{-3}$ | 9.5                           | 5.0                                         | –306                                              | 169                                         |
|          | 643–701               | 14.6                | 684                      | $4.1 \cdot 10^{-2}$ | 24.7                          | 19.1                                        | –279                                              | 210                                         |
| 6        | 491–574               | 31.8                | 551                      | $1.1 \cdot 10^7$    | 105                           | 100                                         | –115                                              | 163                                         |
|          | 574–620               | 5.8                 | 585                      | 0.31                | 28.9                          | 24.0                                        | –260                                              | 176                                         |
| 8        | 414–517               | 82.5                | 499                      | $9.8 \cdot 10^4$    | 69.2                          | 65.0                                        | –154                                              | 142                                         |

*Example of calculations for the thermal decomposition of 8.*

i) Calculation of  $1-\alpha$ :

The initial sample weight:  $m_0 = 5.268$  mg.

**8** decomposes at 414– 517 K (Fig. S1, Table S3).

Sample weight upon decomposition at 414 K:  $m = 5.147$  mg.

$$5.147 \cdot 100 / 5.268 = 97.7 \%$$

Thus,  $1-\alpha = 0.977$  at 414 K.

Sample weight at 466 K:  $m = 4.160$  mg.

$$4.160 \cdot 100 / 5.268 = 79.0 \%$$

$1-\alpha = 0.790$  at 466 K.

Sample weight at 495 K:  $m = 2.123$  mg.

$$2.123 \cdot 100 / 5.268 = 40.3 \%$$

$1-\alpha = 0.403$  at 495 K.

Sample weight at 499 K:  $m = 1.687$  mg.

$$1.687 \cdot 100 / 5.268 = 31.9 \%$$

$1-\alpha = 0.319$  at 499 K.

Sample weight at 517 K:  $m = 0.799$  mg.

$$0.799 \cdot 100 / 5.268 = 15.2 \%$$

$1-\alpha = 0.152$  at 517 K.

**ii)** Calculation of the weight loss:

Sample weight:  $m_0 = 5.268$  mg.

$m = 5.147$  mg at 414 K.

$m = 0.799$  mg at 517 K.

Weight loss =  $5.147 - 0.799 = 4.348$  mg.

$$4.348 \cdot 100 / 5.268 = 82.53 \%$$

(Table S3).

**iii)** Calculation of  $\ln\{-\ln(1-\alpha)/T^2\}$ :

$$\ln\{-\ln(1-\alpha)/T^2\} = \ln\{-\ln(0.977)/414^2\} = -15.81 \text{ at } 414 \text{ K; and } 1/T = 2.415 \cdot 10^{-3}$$

$$\ln\{-\ln(1-\alpha)/T^2\} = \ln\{-\ln(0.790)/466^2\} = -13.73 \text{ at } 466 \text{ K; and } 1/T = 2.150 \cdot 10^{-3}$$

$$\ln\{-\ln(1-\alpha)/T^2\} = \ln\{-\ln(0.403)/495^2\} = -12.50 \text{ at } 495 \text{ K; and } 1/T = 2.020 \cdot 10^{-3}$$

$$\ln\{-\ln(1-\alpha)/T^2\} = \ln\{-\ln(0.319)/499^2\} = -12.29 \text{ at } 499 \text{ K; and } 1/T = 2.000 \cdot 10^{-3}$$

$$\ln\{-\ln(1-\alpha)/T^2\} = \ln\{-\ln(0.152)/517^2\} = -11.86 \text{ at } 517 \text{ K; and } 1/T = 1.930 \cdot 10^{-3}$$

**iv)** The plot of  $\ln\{-\ln(1-\alpha)/T^2\}$  versus  $1/T$  (Fig. S2) gives the slope from which  $E_a$  can be calculated, and  $A$  can be determined from the intercept.

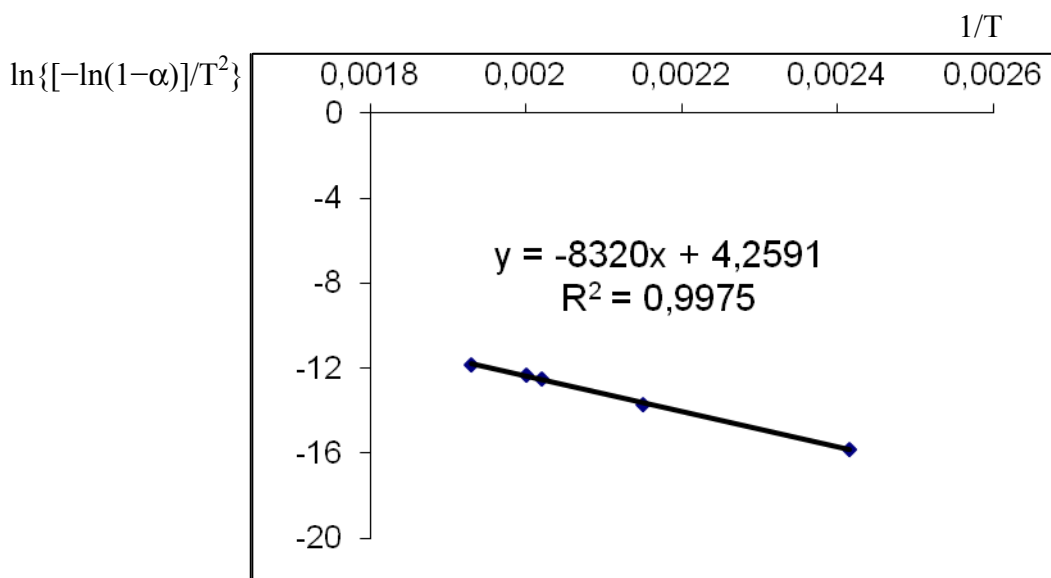

**Fig. S2** Plot of  $\ln\{-\ln(1-\alpha)/T^2\}$  vs.  $1/T$ .

**v)** Calculation of  $E_a$ :

$-E_a/R = -8320$  (Fig. S2).

$-E_a/R = -8320 \Rightarrow E_a = 8320 \cdot 8.314 = 69172.48 \text{ J}\cdot\text{mol}^{-1} \approx 69.2 \text{ kJ}\cdot\text{mol}^{-1}$  (Table S3).

**vi)** Calculation of A:

$\ln[AR/\phi E_a] = +4.2591$  (Fig. S2).

Scan rate was  $10.00^\circ\text{C}/\text{min}$  and sample heated from  $30.00^\circ\text{C}$  to  $800.00^\circ\text{C}$ .

$T = 273.15 + t$  ( $^\circ\text{C}$ )

For instance,  $T_1 = 273.15 + 30 = 303.15 \text{ K}$ ;  $T_2 = 273.15 + 40 = 313.15 \text{ K}$ ;

$T_3 = 273.15 + 50 = 323.15 \text{ K}$ ;  $T_4 = 273.15 + 60 = 333.15 \text{ K}$ ;

$\phi = \Delta T/\Delta \text{time} = T_2 - T_1 / \text{time}_2 - \text{time}_1 = 313.15 - 303.15 / 2 \text{ min} - 1 \text{ min} =$   
 $= 313.15 - 303.15 / 120 \text{ s} - 60 \text{ s} = 0.16666 \text{ K/s} \approx 0.167 \text{ K/s}$ .

$\phi = \Delta T/\Delta \text{time} = T_4 - T_2 / \text{time}_4 - \text{time}_2 = 333.15 - 313.15 / 4 \text{ min} - 2 \text{ min} =$   
 $= 333.15 - 313.15 / 240 \text{ s} - 120 \text{ s} = 0.16666 \text{ K/s} \approx 0.167 \text{ K/s}$ .

$\phi \approx 0.167 \text{ K/s} = \text{constant}$ .

$\ln[AR/\phi E_a] = +4.2591 \Rightarrow \ln[A \cdot 8.314 / 0.167 \cdot 69172] \Rightarrow A = 3.3 \cdot 10^8 \text{ s}^{-1}$  (Table S3).

**vii)** Calculation of  $\Delta^\ddagger H$ :

$T_s = 499 \text{ K}$  (Fig. S1, DTG peak, Table S3).

$\Delta^\ddagger H = E_a - RT_s = 69172 - 8.314 \cdot 499 = 65.0 \text{ kJ}\cdot\text{mol}^{-1}$  (Table S3).

**viii)** Calculation of  $\Delta^\ddagger S$ :

$\Delta^\ddagger S = 2.303R \lg(Ah/kT_s) = 2.303 \cdot 8.314 \lg(3.3 \cdot 10^8 \cdot 6.626 \cdot 10^{-34} / 1.38 \cdot 10^{-23} \cdot 499) = -154 \text{ J}\cdot\text{K}^{-1} \cdot \text{mol}^{-1}$

(Table S3).

**ix)** Calculation of  $\Delta^\ddagger G$ :

$\Delta^\ddagger G = \Delta^\ddagger H - T_s \Delta^\ddagger S = 65.0 - 499 \cdot (-0.1536) = 142 \text{ kJ}\cdot\text{mol}^{-1}$  (Table S3).

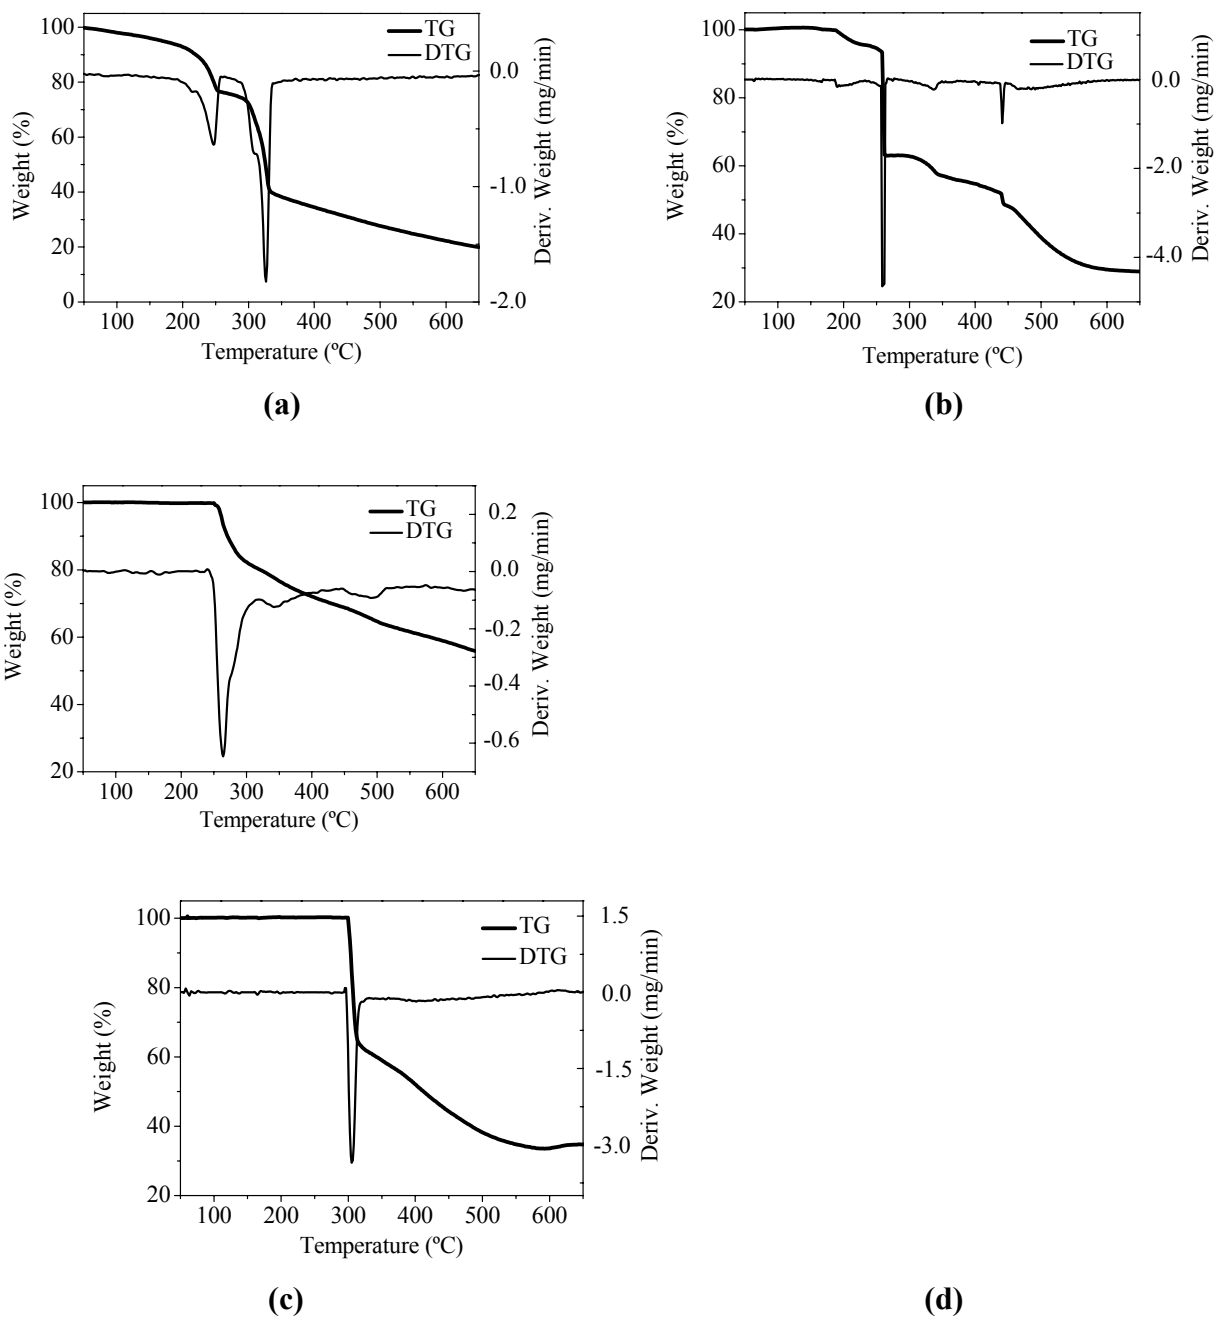

**Fig. S3** TG and DTG curves of  $[\text{Cu}_2(\mu\text{-L}_1)_2(\text{CH}_3\text{OH})_2]$  (a), **9** (b), **10** (c) and **13** (d).

## X-ray analyses



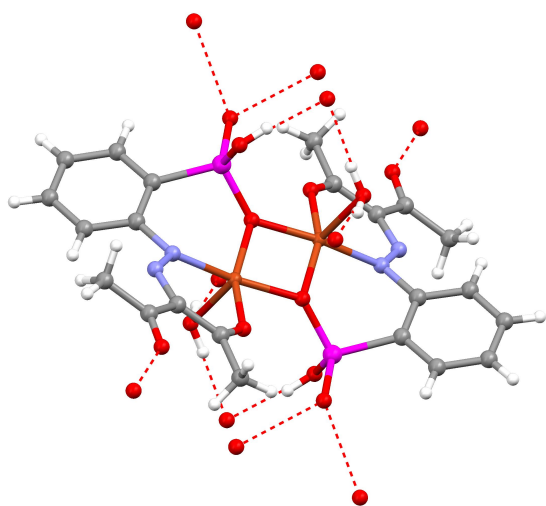

(a)

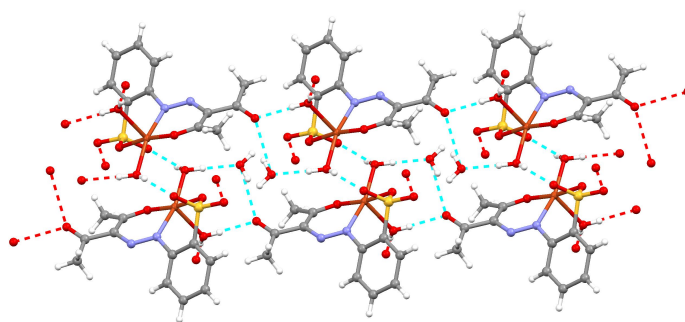

(b)

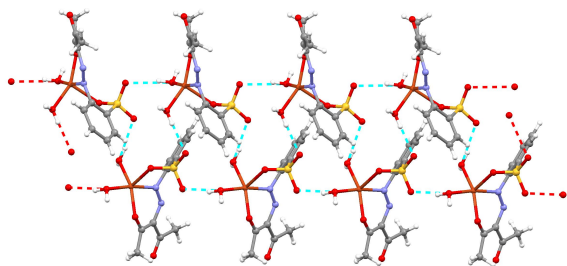

(c)

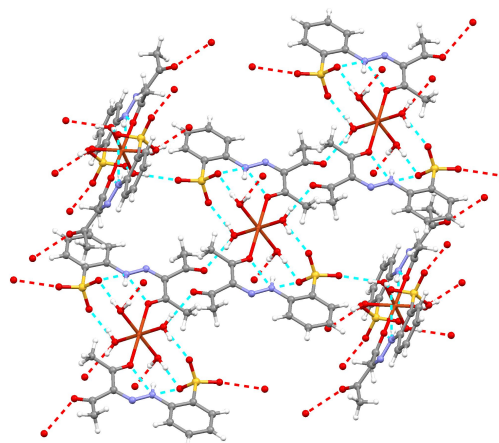

(d)

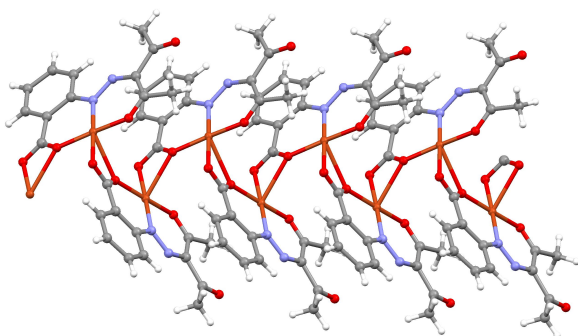

(e)

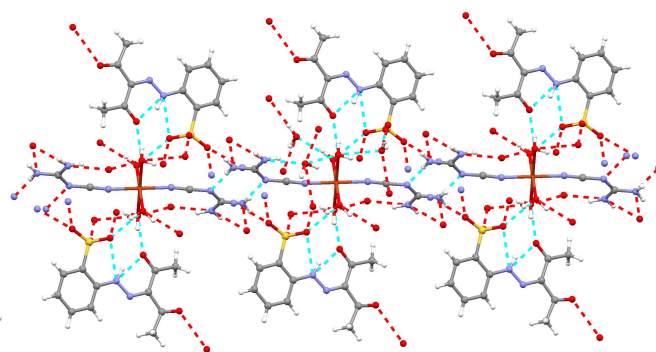

(f)

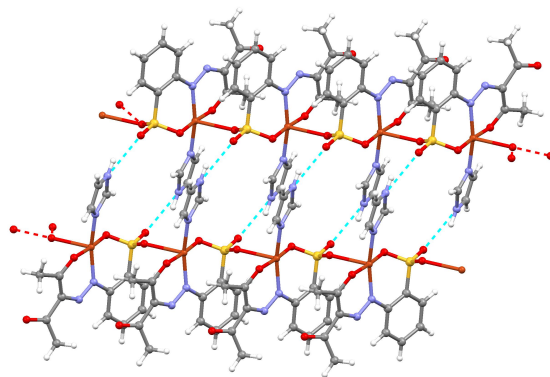

(g)

**Fig. S4** Packing diagrams of Cu-ADB complexes **9** (a), **10** (b), **11** (c), **12** (d), **13** (e), **14** (f), **15** (g).

## Catalytic activity of the complexes

**Table S4** Peroxidative oxidation of cyclohexane to cyclohexanol and cyclohexanone<sup>a</sup>

| Entry | Cu catalyst | n(H <sub>2</sub> O <sub>2</sub> )/ n(HNO <sub>3</sub> )/ |        | Yield <sup>b</sup> of products, % |        |                    | TON <sup>d</sup> |
|-------|-------------|----------------------------------------------------------|--------|-----------------------------------|--------|--------------------|------------------|
|       |             | n(Cat)                                                   | n(Cat) | Alcohol                           | Ketone | Total <sup>c</sup> |                  |
| 1     | <b>9</b>    | 750                                                      | 0      | 5.2                               | 6.5    | 11.7               | 23.8             |
| 2     | <b>9</b>    | 750                                                      | 10     | 5.4                               | 6.5    | 11.9               | 24.2             |
| 3     | <b>9</b>    | 750                                                      | 20     | 4.7                               | 7.6    | 12.3               | 25.0             |
| 4     | <b>9</b>    | 750                                                      | 30     | 4.3                               | 7.2    | 11.5               | 23.4             |
| 5     | <b>9</b>    | 750                                                      | 60     | 4.0                               | 6.3    | 10.3               | 21.0             |
| 6     | <b>9</b>    | 500                                                      | 10     | 3.1                               | 4.6    | 7.7                | 15.7             |
| 7     | <b>9</b>    | 1000                                                     | 10     | 6.9                               | 9.9    | 16.8               | 34.2             |
| 8     | <b>9</b>    | 1250                                                     | 10     | 8.7                               | 10.8   | 19.5               | 39.7             |
| 9     | <b>10</b>   | 750                                                      | 0      | 2.1                               | 2.5    | 4.6                | 4.6              |
| 10    | <b>10</b>   | 750                                                      | 10     | 3.4                               | 4.5    | 7.9                | 7.9              |
| 11    | <b>10</b>   | 750                                                      | 20     | 3.6                               | 4.7    | 8.3                | 8.3              |
| 12    | <b>10</b>   | 750                                                      | 30     | 3.2                               | 5.3    | 8.5                | 8.5              |
| 13    | <b>10</b>   | 750                                                      | 60     | 3.1                               | 5.8    | 8.9                | 8.9              |
| 14    | <b>10</b>   | 500                                                      | 10     | 3.3                               | 3.5    | 6.8                | 6.8              |
| 15    | <b>10</b>   | 1000                                                     | 10     | 4.3                               | 7.1    | 11.4               | 11.4             |
| 16    | <b>10</b>   | 1250                                                     | 10     | 5.7                               | 6.5    | 12.2               | 12.2             |
| 17    | <b>10</b>   | 1000                                                     | 10     | 4.4                               | 7.0    | 11.4               | 326              |
| 18    | <b>12</b>   | 750                                                      | 0      | 2.8                               | 4.1    | 6.9                | 12.1             |
| 19    | <b>12</b>   | 750                                                      | 10     | 6.7                               | 9.1    | 15.8               | 27.8             |
| 20    | <b>12</b>   | 750                                                      | 20     | 6.2                               | 9.2    | 15.4               | 27.1             |
| 21    | <b>12</b>   | 750                                                      | 30     | 6.4                               | 9.2    | 15.6               | 27.4             |
| 22    | <b>12</b>   | 750                                                      | 60     | 5.5                               | 7.5    | 13.0               | 22.8             |
| 23    | <b>12</b>   | 500                                                      | 10     | 4.7                               | 5.7    | 10.4               | 18.3             |
| 24    | <b>12</b>   | 1000                                                     | 10     | 9.3                               | 10.9   | 20.2               | 35.5             |
| 25    | <b>12</b>   | 1250                                                     | 10     | 10.5                              | 12.0   | 22.5               | 39.5             |
| 26    | <b>12</b>   | 1000                                                     | 10     | 8.9                               | 10.9   | 19.8               | 566              |
| 27    | <b>13</b>   | 750                                                      | 0      | 4.2                               | 5.8    | 10.0               | 10.3             |
| 28    | <b>13</b>   | 750                                                      | 10     | 5.3                               | 6.3    | 11.6               | 11.9             |
| 29    | <b>13</b>   | 750                                                      | 20     | 5.3                               | 6.7    | 12.0               | 12.3             |
| 30    | <b>13</b>   | 750                                                      | 30     | 5.2                               | 7.2    | 12.4               | 12.7             |

|    |                                                                       |      |    |     |      |                |      |
|----|-----------------------------------------------------------------------|------|----|-----|------|----------------|------|
| 31 | <b>13</b>                                                             | 750  | 60 | 4.8 | 6.7  | 11.5           | 11.8 |
| 32 | <b>13</b>                                                             | 500  | 10 | 3.8 | 4.5  | 8.3            | 8.5  |
| 33 | <b>13</b>                                                             | 1000 | 10 | 7.2 | 9.1  | 16.3           | 16.7 |
| 34 | <b>13</b>                                                             | 1250 | 10 | 7.4 | 9.5  | 16.9           | 17.4 |
| 35 | $[\text{Cu}_2(\mu\text{-L}^1)_2(\text{CH}_3\text{OH})_2]^{8\text{e}}$ | 1000 | 10 | 7.1 | 16.6 | 23.7           | 23.7 |
| 36 | $\text{Cu}(\text{NO}_3)_2^{\text{e}}$                                 | 1000 | 10 | 1.6 | 3.8  | 5.4            | 5.4  |
| 37 | <b>2,4</b> or <b>6</b> <sup>e</sup>                                   | 1000 | 10 | -   | -    | - <sup>f</sup> | -    |
| 38 | Blank                                                                 | 1000 | 10 | -   | -    | - <sup>f</sup> | -    |

<sup>a</sup> Selected data; reaction conditions:  $\text{C}_6\text{H}_{12}$  (1 mmol), Cu-catalyst (0.35-10.0  $\mu\text{mol}$ ), MeCN/ $\text{H}_2\text{O}$  4 mL,  $n(\text{HNO}_3)/n(\text{Cat}) = 0\text{-}60$ ,  $\text{H}_2\text{O}_2$  (5.0-12.5 mmol added as an aqueous 30% solution), reaction time: 6 h, 298 K. <sup>b</sup> Moles of product/100 moles of  $\text{C}_6\text{H}_{12}$  (Alcohol = cyclohexanol, Ketone = cyclohexanone). <sup>c</sup> Cyclohexanol + cyclohexanone. <sup>d</sup> Overall TON values (moles of products/mole of catalyst). <sup>e</sup> For comparative purposes,  $\text{Cu}(\text{NO}_3)_2$  and ligands **2,4** and **6** were used as catalysts (10.0  $\mu\text{mol}$ ). <sup>f</sup> Traces, < 0.3 %.

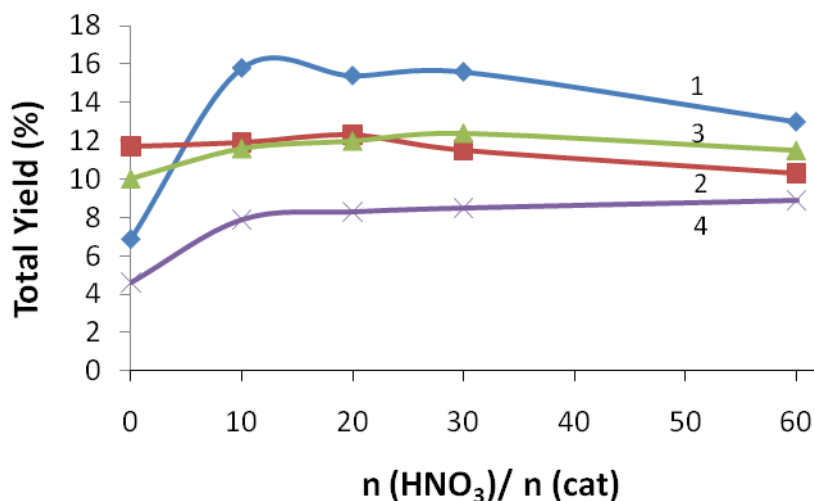

**Fig. S5** Effect of the nitric acid-to-catalyst molar ratio on the total yield of products in the cyclohexane oxidation catalyzed by complexes **12** (1), **9** (2), **13** (3) and **10** (4). Reaction conditions are those of Table S4.

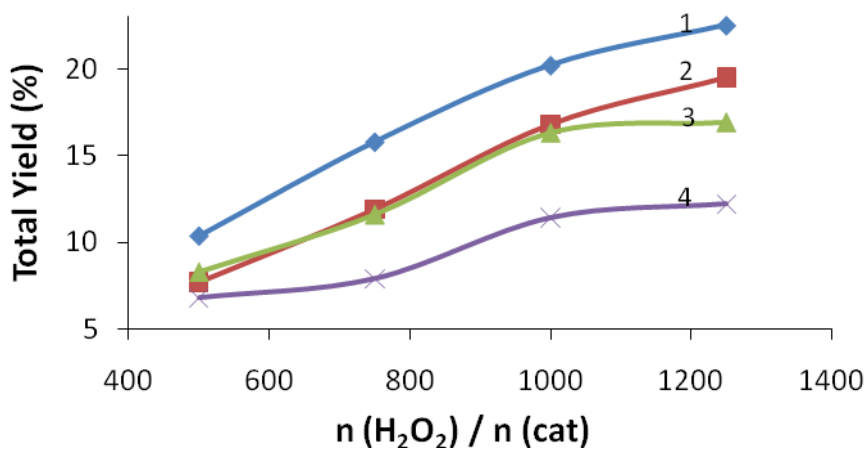

**Fig. S6** Effect of the oxidant-to-catalyst molar ratio on the total yield of products in the cyclohexane oxidation catalyzed by complexes **12** (1), **9** (2), **13** (3) and **10** (4). Reaction conditions are those of Table S4.
